# Supplementary material for: Tigecycline Sensitivity Reduction in Escherichia coli Due to Widely Distributed tet(A) Variants
Source: MDPI journal article supplement (doi:10.3390/microorganisms11123000), 2023-12-18
Supplement: s1 [file s1]

Supplementary information

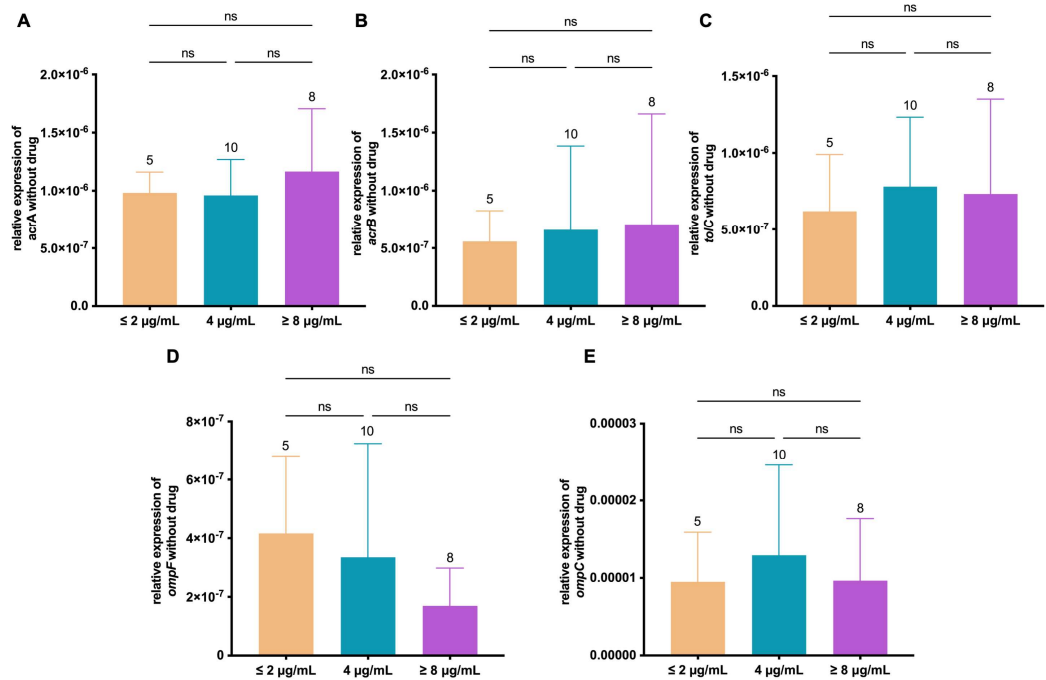

Supplementary Figure S1: The relative expression of *acrA* (A), *acrB* (B), *tolC* (C), *ompF* (D) and *ompC* (E) without tigecycline.

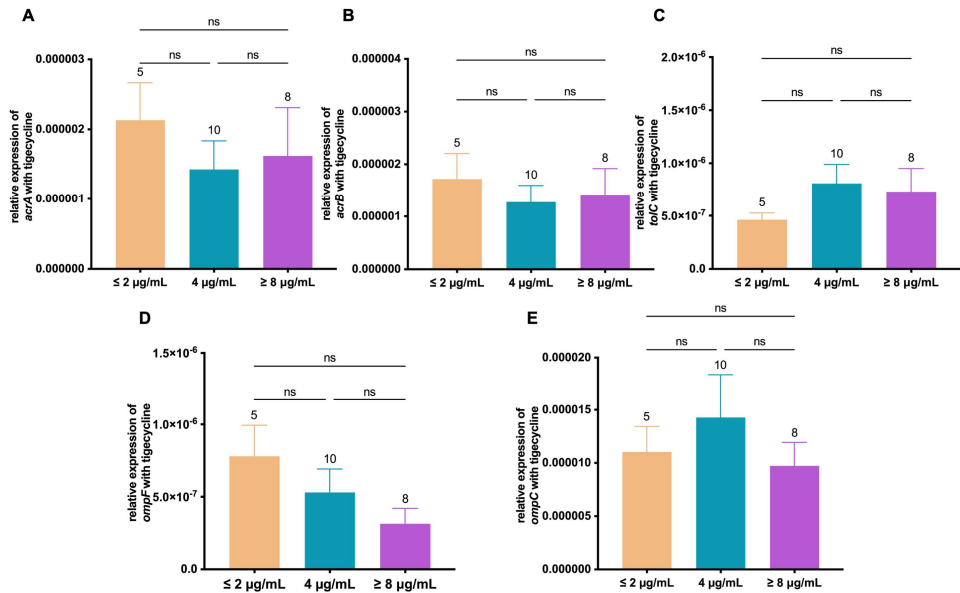

Supplementary Figure S2: The relative expression of *acrA* (A), *acrB* (B), *tolC* (C), *ompF* (D) and *ompC* (E) with 0.5  $\mu\text{g/mL}$  tigecycline.

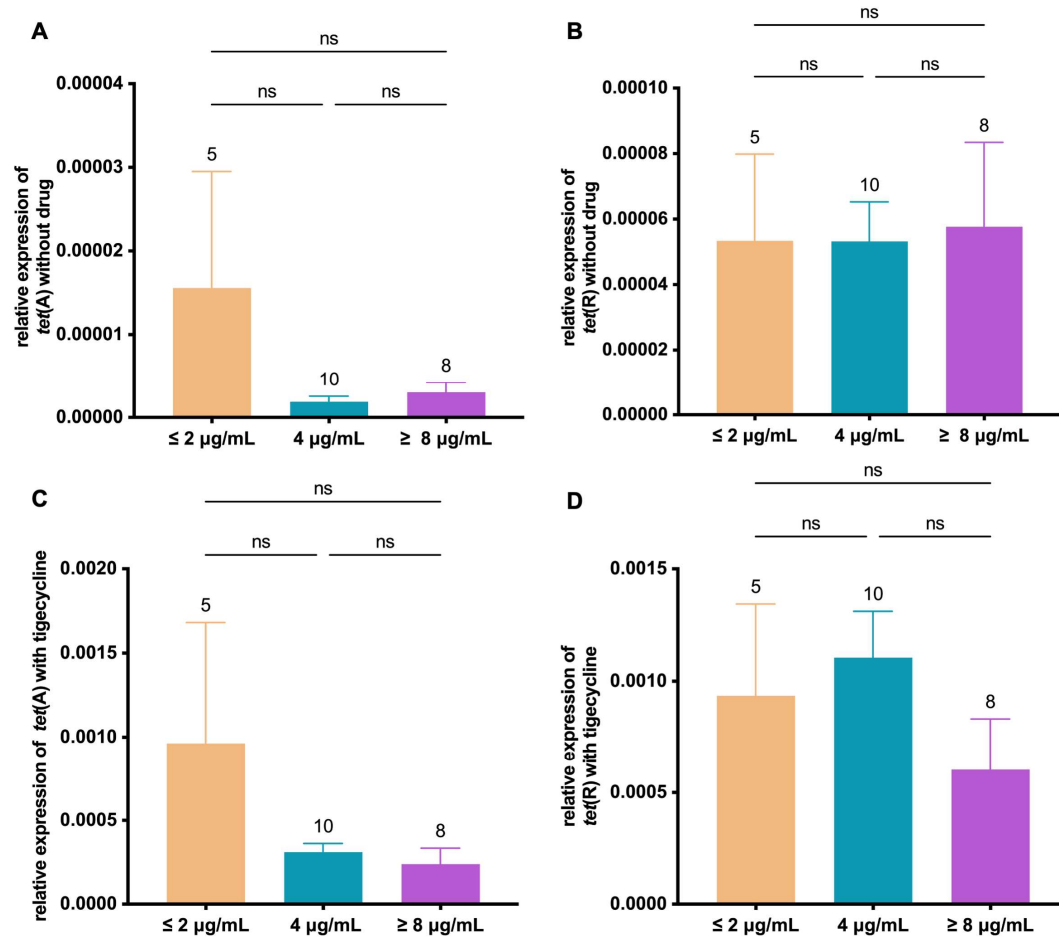

**Supplementary Figure S3:** The relative expression of *tet(A)* and *tet(R)* without (A, B) or with 0.5 µg/mL (C, D) tigecycline.



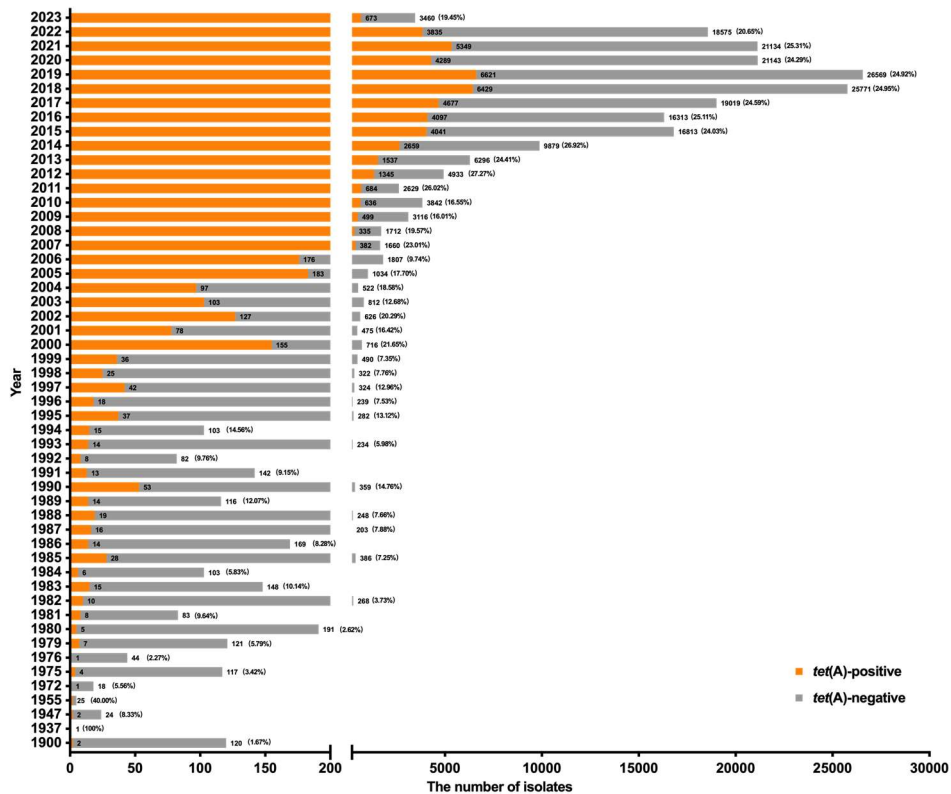

Supplementary Figure S5: The presence of all *tet(A)*-variant-harboring *E. coli* from the whole world in different years.

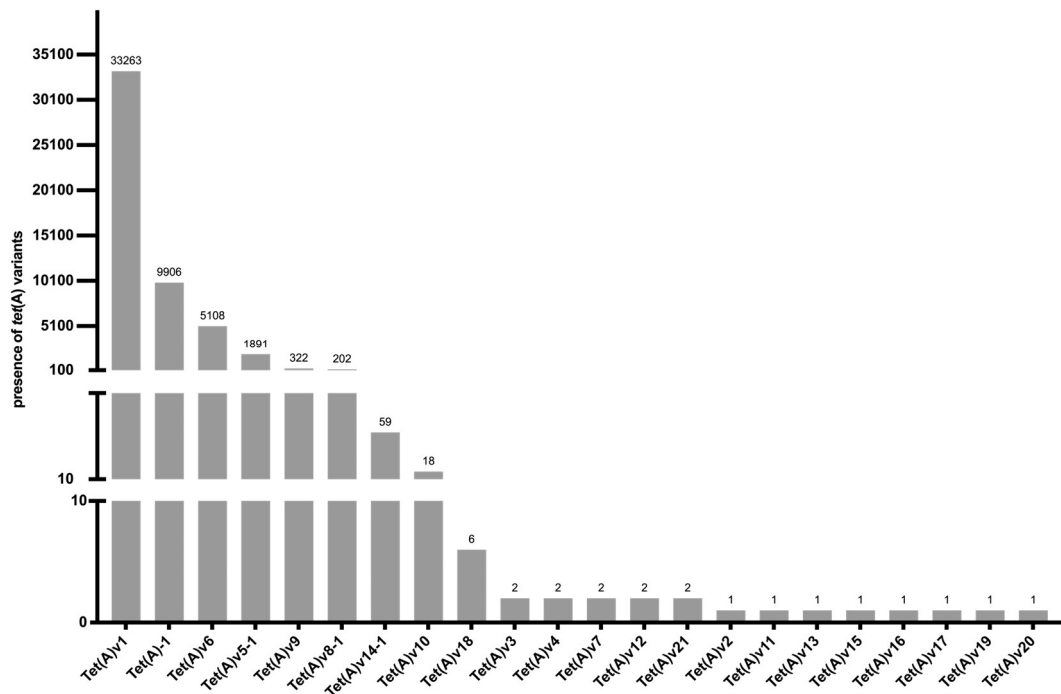

Supplementary Figure S6: The presence of different *tet(A)*-variant-harboring *E. coli* from the world.

**Table S1 The primers for cloning all *tet(A)* variants**

| Primer name                | Primers (5'-3')                             |
|----------------------------|---------------------------------------------|
| <i>tetA-tetR</i> -insert-F | aaaacgacggccagtgaattGCTTGCCGGAAGTCGCCT      |
| <i>tetA-tetR</i> -insert-R | gaccatgattacgccaagctCTCTGCTGTAGTGAGTGGGTTGC |
| pUC19-linear-F             | AGCTTGCGTAATCATGGTCATAG                     |
| pUC19-linear-R             | AATTCAGTGGCCGTCGTTTTACAA                    |

**Table S2 The primers for point mutation**

| Primer name   | Primers (5'-3')                                |
|---------------|------------------------------------------------|
| pUC19_I5R_F   | gttgggtttcacgtctggcc                           |
| pUC19_I5R_R   | tcgtggaacgataggcctatg                          |
| mutant_I5R_F  | taggcctatcgttccacgaTCAGCGATCGGCTCGTTG          |
| mutant_I5R_R  | ggccagacgtgaaaccaacAGACCCCTGATCGTAATTCTGAGC    |
| pUC19_V55M_F  | caacgcatacagcgccagc                            |
| pUC19_V55M_R  | tacagacaagctgtgaccgtctcc                       |
| mutant_V55M_F | acggtcacagcttgtctgtaAGCGGATGCCGGGAGCAG         |
| mutant_V55M_R | tgctggcgctgtatgcgttgATGCAATTTGCCTGCGCA         |
| pUC19_I75V_F  | tggccgcccgcgaaacg                              |
| pUC19_I75V_R  | tacagacaagctgtgaccgtctcc                       |
| mutant_I75V_R | atcgtttcggcgcgccgGTCTTGCTCGTCTCGCTGGC          |
| mutant_I75V_F | acggtcacagcttgtctgtaAGCGGATGCCGGGAGCAG         |
| pUC19_T84A_F  | ggcgccggccagcgagac                             |
| pUC19_T84A_R  | tacagacaagctgtgaccgtctcc                       |
| mutant_T84A_F | acggtcacagcttgtctgtaAGCGGATGCCGGGAGCAG         |
| mutant_T84A_R | tcgtctcgctggcgcgctGCTGTCGACTACGCCATCATGG       |
| pUC19_ASF_F   | gagcgggttgagagcctcc                            |
| pUC19_ASF_R   | ttcacgctcatcaccgaaacg                          |
| mutant_ASF_F  | gtttcgggtgatgacggtgaaAACCTCTGACACATGCAGCTCC    |
| mutant_ASF_R  | gggaggctctcaaccgctcGCTTCGTTcCGGTGGGCCCCGGGGCAT |

**Table S3 The primer for qPCR**

| Genes       | Primers (5'-3')                                                       | Standard curve                  | Lengh (bp) | Annealing temp (°C) | Reference |
|-------------|-----------------------------------------------------------------------|---------------------------------|------------|---------------------|-----------|
| <i>acrB</i> | F: 5'-CAAGGAAACGAACGCAATACC-3'<br>R: 5'-AGTCGGTGTTGCGCCGTTAAC-3'      | Ct = -3.170 logcopies + 38.541  | 74         | 60                  | [32]      |
| <i>acrA</i> | F: 5'-TGCAGAGGTTTCAGTTTTGACTGTT-3'<br>R: 5'-CTCTCAGGCAGCTTAGCCCTAA-3' | Ct = -3.134 logcopies + 38.040  | 107        | 60                  | [32]      |
| <i>ompF</i> | F: 5'-CGTACTTCAGACCAGTAGCC-3'<br>R: 5'-GAACTTCGCTGTTTCAGTACC-3'       | Ct = -3.2 logcopies + 37.897    | 209        | 60                  | [33]      |
| <i>ompC</i> | F: 5'-ATTCTGGCAGTACGTCGGTC-3'<br>R: 5'-AAACAACCTCCTGGACCCGTG          | Ct = - 3.087 logcopies + 37.298 | 125        | 60                  | [34]      |
| <i>tolC</i> | F: 5'-AAGCCGAAAAACGCAACCT-3'<br>R: 5'-CAGAGTCGGTAAGTGACCATC-3'        | Ct = - 3.05 blogcopies + 37.106 | 101        | 60                  | [35]      |
